# Supplementary material
Source: MDPI journal article supplement (https://www.mdpi.com/2311-5629/9/1/7)
Supplement: s1 [file s1]

# **Comparison of the Electrochemical Response of Carbon Fiber Reinforced Plastic (CFRP), Glassy Carbon, and Highly Ordered Pyrolytic Graphite (HOPG) in Near Neutral Aqueous Chloride Media**

Stanley Udochukwu Ofoegbu<sup>1,2,\*</sup>, M.G.S. Ferreira<sup>2</sup>, Helena I.S.Nogueira<sup>3</sup>, and M.L. Zheludkevich<sup>4,5</sup>

<sup>1</sup>*Centre for Mechanical Technology and Automation (TEMA), Department of Mechanical Engineering, University of Aveiro, Campus Universitário de Santiago 3810-193 Aveiro, Portugal.*

<sup>2</sup>*Department of Materials and Ceramic Engineering, CICECO-Aveiro Institute of Materials, University of Aveiro, Campus Universitário de Santiago 3810-193 Aveiro, Portugal.*

<sup>3</sup>*Department of Chemistry, CICECO-Aveiro Institute of Materials, University of Aveiro, Campus Universitário de Santiago 3810-193 Aveiro, Portugal.*

<sup>4</sup>*Institute of Surface Science, Helmholtz-Zentrum Hereon, Max-Planck-Strasse 1, 21502 Geesthacht (Germany).*

<sup>5</sup>*Institute for Materials Science, Faculty of Engineering, Kiel University, Kiel, 24103, Germany.*

## **Supplementary Material**

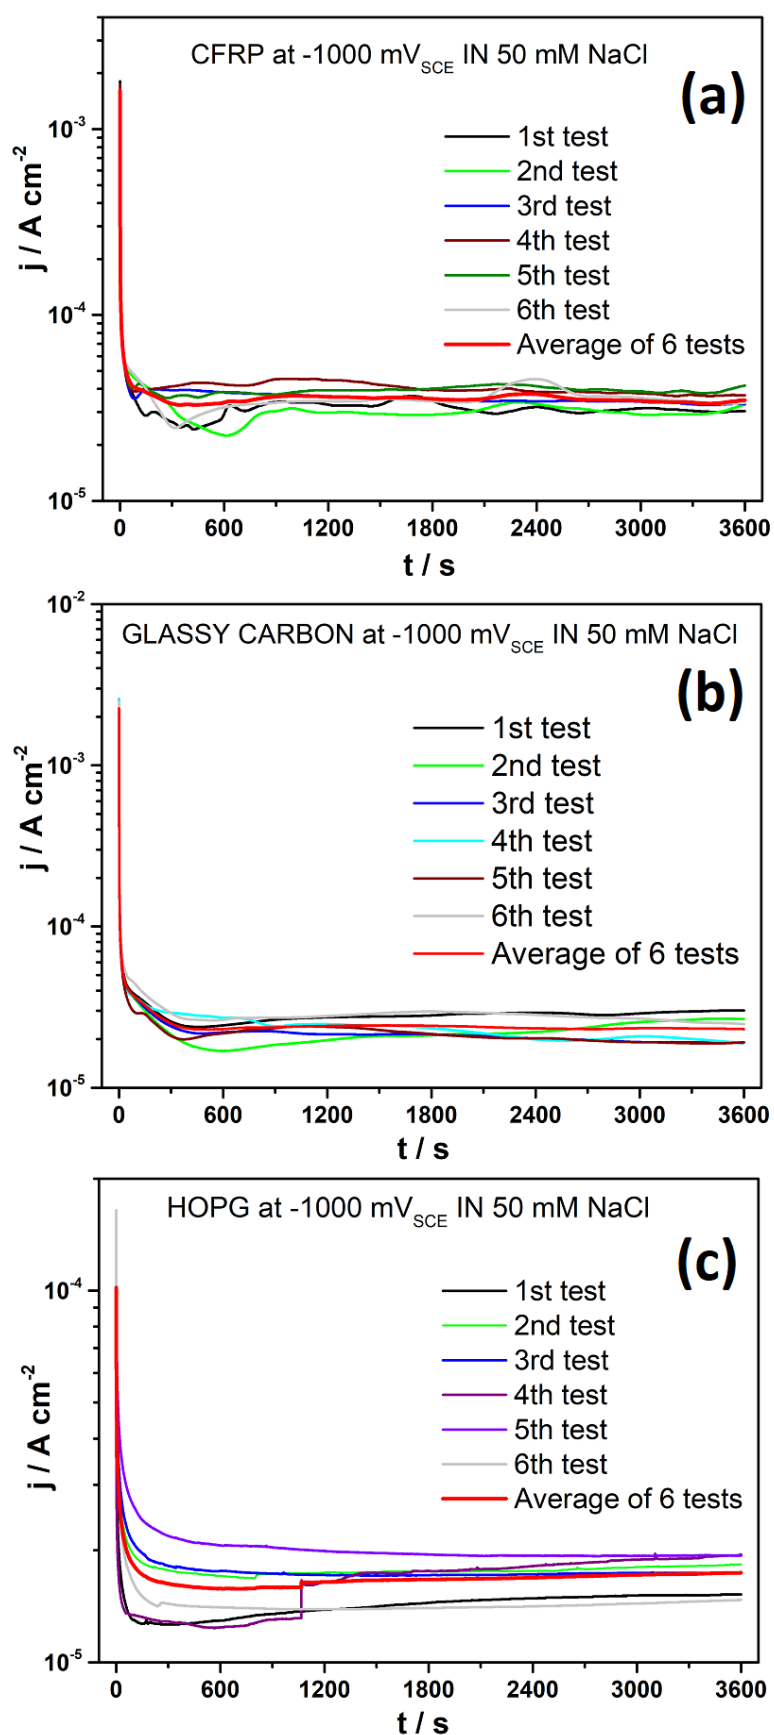

**Figure S1:** Hextuple chronoamperometric profiles of the 3 carbon surfaces during 1-hour polarization at  $-1000 \text{ mV}_{\text{SCE}}$  in 50 mM NaCl.

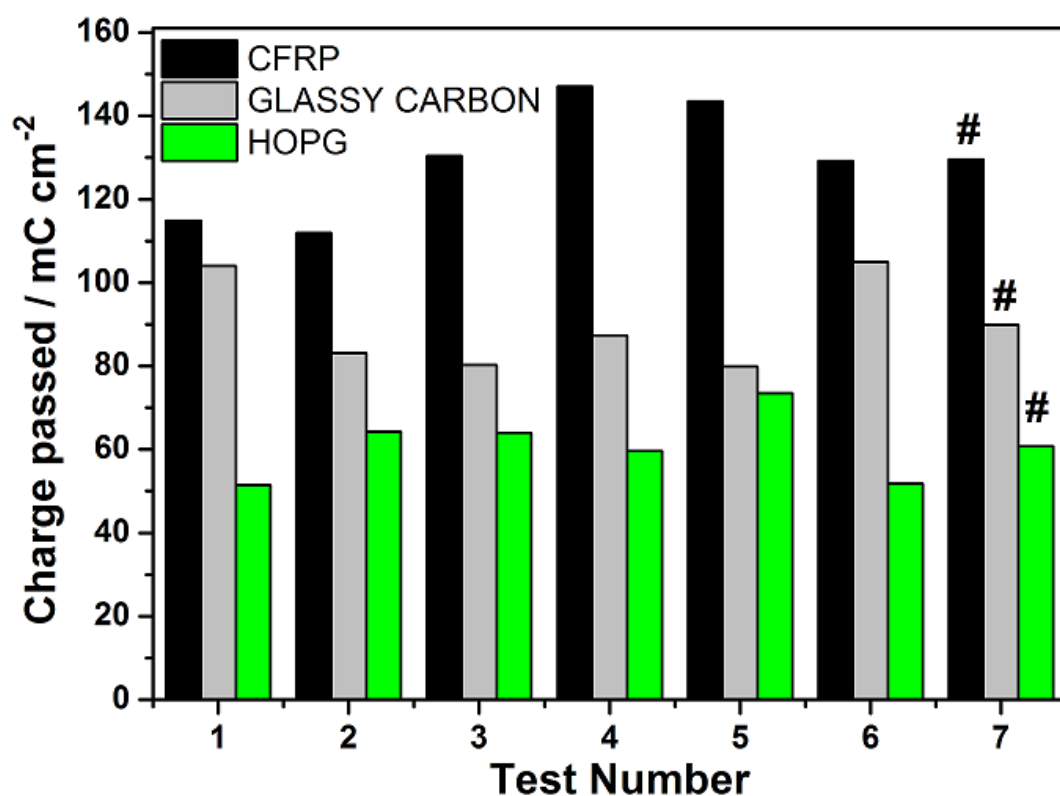

**Figure S2** : Comparison of charges passed during 1-hour polarization of CFRP, HOPG, and glassy carbon in 50 mM NaCl at -1000 mV<sub>SCE</sub> in hexuple chronoamperometric tests (Test number 7 and # denotes the mean values from 6 tests on each carbon surface).

**Table S1:** Table of Integrated charges passed in hexuple chronoamperometric measurements

|                    | CFRP                                 | Glassy Carbon                        | HOPG                                 |
|--------------------|--------------------------------------|--------------------------------------|--------------------------------------|
| Test number        | Charge passed (mC cm <sup>-2</sup> ) | Charge passed (mC cm <sup>-2</sup> ) | Charge passed (mC cm <sup>-2</sup> ) |
| 1                  | 114.91                               | 104                                  | 51.43                                |
| 2                  | 111.93                               | 83.1                                 | 64.29                                |
| 3                  | 130.42                               | 80.3                                 | 63.93                                |
| 4                  | 147.12                               | 87.4                                 | 59.64                                |
| 5                  | 143.54                               | 79.9                                 | 73.57                                |
| 6                  | 129.22                               | 105                                  | 51.79                                |
| Average            | 129.52                               | 89.95                                | 60.77                                |
| Standard deviation | 14.35                                | 11.59                                | 8.43                                 |

**Table S2:** Table of Outputs from ANOVA tests for significance

Parameter

Table Analyzed Data 1

One-way analysis of variance

P value < 0.0001

P value summary \*\*\*

Are means signif. different? (P < 0.05) Yes

Number of groups 3

F 52.10

R square 0.8742

**Bartlett's test for equal variances**

Bartlett's statistic (corrected) 1.244

P value 0.5369

P value summary ns

Do the variances differ signif. (P < 0.05) No

| ANOVA Table                 |       | SS    | df | MS    |
|-----------------------------|-------|-------|----|-------|
| Treatment (between columns) |       | 14287 | 2  | 7144  |
| Residual (within columns)   |       | 2057  | 15 | 137.1 |
| Total                       | 16344 | 17    |    |       |

| Bonferroni's Multiple Comparison Test |       |       |     | Mean Diff. | t | Significant? P < 0.05? | Summary 95% CI of diff. |
|---------------------------------------|-------|-------|-----|------------|---|------------------------|-------------------------|
| CFRP vs GC                            | 39.57 | 5.853 | Yes | ***        |   |                        | 21.36 to 57.78          |
| CFRP vs HOPG                          | 68.75 | 10.17 | Yes | ***        |   |                        | 50.54 to 86.96          |
| GC vs HOPG                            | 29.18 | 4.315 | Yes | **         |   |                        | 10.96 to 47.39          |
